# Supplementary material for: Influence of Snowmelt Timing on the Diet Quality of Pyrenean Rock Ptarmigan (Lagopus muta pyrenaica): Implications for Reproductive Success
Source: PubMed Central journal article supplement (PMC4746074; doi:10.1371/journal.pone.0148632), 2016-02-05
Supplement: pone.0148632.s002.pdf [file pone.0148632.s002.pdf]

**S1 Table. Mean values of N content (% of dry matter) of different food items utilised to estimate the potential N content of each individual diet determined by microhistological analysis.** Winter period comprises from September to date of snowmelt. Diet items are leaves unless otherwise indicated.

| Date                                  | May | June | July | August | Winter | Reference                                        |
|---------------------------------------|-----|------|------|--------|--------|--------------------------------------------------|
| Arthropod                             | 7.4 | 7.4  | 7.4  | 7.4    | 7.4    | Klasing (1998)                                   |
| <i>R. ferrugineum</i> flowers         | 2.0 | 2.0  | 1.6  | 1.6    | 1.6    | this study                                       |
| Gram ears (mean 7 spp.)               | 1.6 | 1.6  | 1.6  | 1.6    | 1.6    | Marinas & Garcia-Gonzalez (2006)                 |
| Forb flowers (mean 5 spp.)            | 2.2 | 2.2  | 2.2  | 2.2    | 2.2    | Marinas & Garcia-Gonzalez (2006)                 |
| <i>R. ferrugineum</i> bud             | 2.0 | 1.6  | 1.5  | 1.3    | 1.2    | this study                                       |
| <i>R. ferrugineum</i> stem            | 1.1 | 1.1  | 1.1  | 1.1    | 1.1    | this study                                       |
| <i>R. ferrugineum</i> spp. (stem+bud) | 1.2 | 1.2  | 1.2  | 1.2    | 1.2    | this study                                       |
| <i>R. ferrugineum</i> (stem+bud)      | 1.0 | 1.0  | 1.0  | 1.0    | 1.0    | this study                                       |
| Rest of species (stem+bud)            | 1.0 | 1.0  | 1.0  | 1.0    | 1.0    | this study                                       |
| Graminoid (mean 13 spp.)              | 0.9 | 2.3  | 1.4  | 1.3    | 0.9    | Marinas & Garcia-Gonzalez (2006)                 |
| Dicot forb (mean 10 spp.)             | 2.1 | 3.3  | 2.4  | 2.1    | 2.1    | Marinas & Garcia-Gonzalez (2006)                 |
| <i>Calluna vulgaris</i>               | 1.6 | 1.3  | 1.4  | 1.3    | 1.2    | this study                                       |
| <i>Dryas octopetala</i>               | 2.1 | 1.9  | 1.9  | 1.7    | 1.1    | this study                                       |
| <i>Loiseleuria procumbens</i>         | 0.8 | 0.9  | 0.8  | 0.8    | 0.8    | this study                                       |
| <i>Pinus uncinata</i>                 | 1.2 | 1.2  | 1.7  | 1.4    | 1.2    | Garin et al (1996)                               |
| <i>Rhododendron ferrugineum</i>       | 1.4 | 2.8  | 1.7  | 1.7    | 1.1    | this study                                       |
| <i>Salix herbacea</i>                 | 1.7 | 2.3  | 1.7  | 1.7    | 1.7    | this study                                       |
| <i>Salix pyrenaica</i>                | 3.2 | 2.5  | 2.2  | 1.8    | 1.2    | this study                                       |
| <i>Salix</i> spp.                     | 3.2 | 2.4  | 1.9  | 1.8    | 1.4    | this study                                       |
| <i>Dryas/ R. ferrugineum</i>          | 1.8 | 2.4  | 1.8  | 1.7    | 1.1    | this study                                       |
| <i>Dryas/Salix</i>                    | 2.7 | 2.2  | 1.9  | 1.8    | 1.3    | this study                                       |
| <i>Vaccinium myrtillus</i>            | 2.9 | 2.1  | 1.6  | 1.6    | 1.0    | this study                                       |
| <i>Vaccinium uliginosum</i>           | 1.6 | 2.2  | 1.9  | 1.6    | 1.6    | this study                                       |
| <i>Vaccinium</i> spp.                 | 1.3 | 2.1  | 1.8  | 1.6    | 1.3    | this study                                       |
| <i>Polygonum viviparum</i> (bulbils)  | 2.8 | 2.9  | 2.8  | 2.8    | 2.8    | Moss (1968); Moss & Parkinson (1975)             |
| <i>R. ferrugineum</i> fruit           |     |      |      | 1.5    | 1.5    | this study                                       |
| <i>Vaccinium</i> spp. fruit           |     |      |      |        | 1.3    | Filacorda et al. (1997); Moss & Parkinson (1975) |
| Asteraceae seed                       |     |      | 3.4  | 3.4    | 3.4    | Fenner (1986)                                    |
| Seed (indeter.)                       |     |      | 3.4  | 3.4    | 3.4    | Fenner (1986)                                    |
| graminoid seed                        |     |      | 2    | 2      | 2      | Klasing (1998)                                   |

Klasing KC. Comparative Avian Nutrition. Oxon: CAB International; 1998.

Marinas M, García González R. Preliminary data on nutritional assessment of abundant species in alpine pastures of the Pyrenees. *Pirineos. A Journal of Mountain Ecology* 2006; 161: 85-109.

Garin I, Azorín J, Aldezábal A, García-González R. Implicaciones nutritivas del contenido en taninos de varias especies leñosas. In: XXXVI Reunión Científica de la SEEP; 1996; La

Rioja: Gobierno de La Rioja. Consejería de Agricultura, Ganadería y Desarrollo Rural; 1996. p. 293-298.

Moss R. Food selection and nutrition in Ptarmigan (*Lagopus mutus*). In: Crawford MA, editor. Comparative Nutrition of Wild Animals. London & New York: Academic Press; 1968. p. 207-216.

Moss R, Parkinson JA. The digestion of bulbils (*Polygonum viviparum* L.) and berries (*Vaccinium myrtillus* L. and *Empetrum* sp.) by captive ptarmigan (*Lagopus mutus*). British Journal of Nutrition 1975; 33(2): 197-206.

Filacorda S, Sepulcri A, Piasentier E, de Franceschi PF. Estimation of the chemical composition of black grouse *Tetrao tetrix* diets in the eastern Italian Alps. Wildlife Biology 1997; 3: 187-
